# Supplementary material for: Dynamics of DNA Methylation in Recent Human and Great Ape Evolution
Source: PLOS journal article supplement (doi:10.1371/journal.pgen.1003763), 2013-09-05

Figure S3:

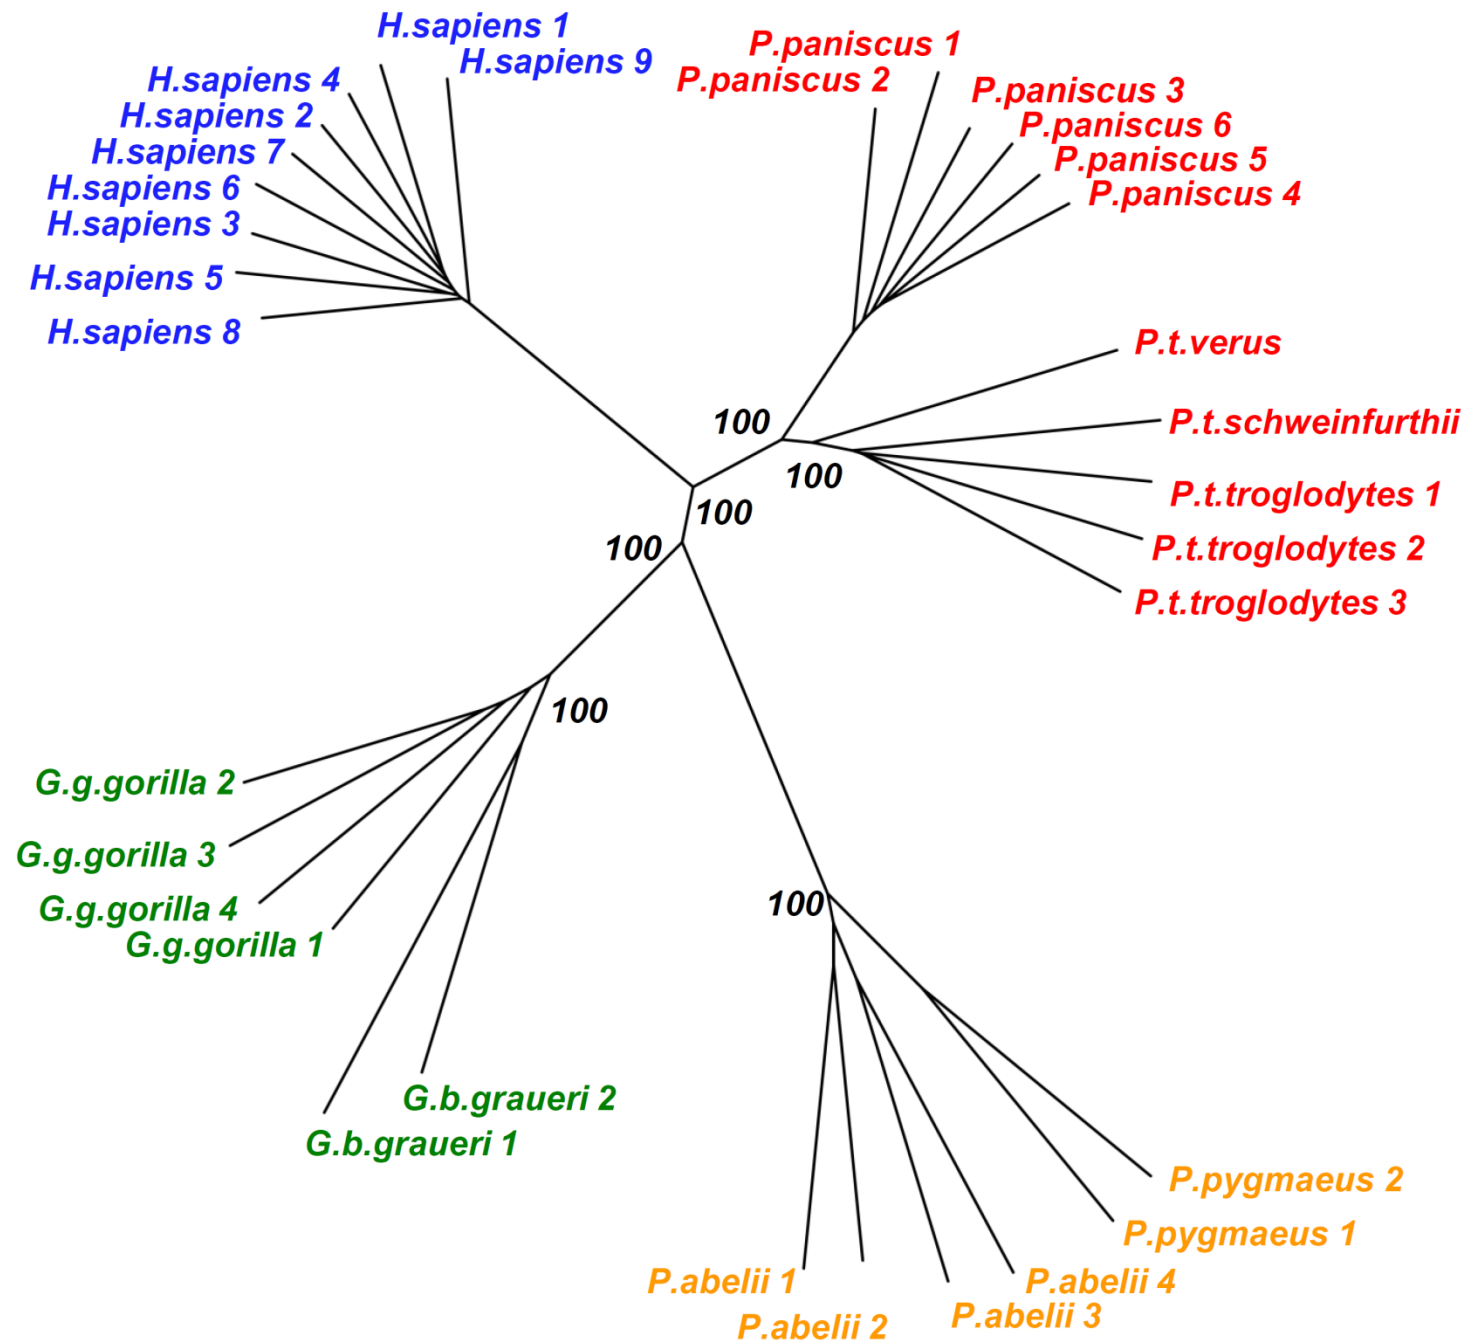

Supplement: S3 (10.1371/journal.pgen.1003763.s003) [file journal.pgen.1003763.s003]
